# Supplementary material
Source: HighWire-hosted journal article supplement (http://rc.rcjournal.com/highwire/filestream/18196/field_highwire_adjunct_files/0/Appendices.docx)
Supplement: Appendices.docx [file Appendices.docx]

Appendices

Appendix A: Effective Clinical Teacher Characteristics Instrument

Part 1: Demographics

1. Dear directors, managers, supervisors, educational coordinators, assistant directors, and assistant managers please answer the following questions:

1- Indicate your position

1. Director
2. Manager
3. Supervisor
4. Educational Coordinator
5. Assistant Director
6. Assistant Manager
7. Other ………….

2. How long have you been in your current position?

______________________________

3. How long have you been a respiratory therapist?

___________________________________

3.Indicate your Gender:

(A) Male

(B) Female

4. Your Highest Degree:

(A) AS/ AAS

(B) BS/BA

(C) MS/MA

(D) PhD/Ed.D/ D.H.Sc

5. Have you choose hospital-based staff to precept a student in your current position?

(A) Yes

(B) No

| No. | Characteristic of Effective Clinical Instructor | Most Important (5) | Important  (4) | Neutral uncertain (3) | Less Important  (2) | Unimportant (1) |
| --- | --- | --- | --- | --- | --- | --- |
| I | Professional competence |  |  |  |  |  |
| 1 | Facilitate student’s awareness of their professional responsibility |  |  |  |  |  |
| 2 | Show genuine interest in patients and their care |  |  |  |  |  |
| 3 | Demonstrate knowledge of respiratory therapy in the area of instruction |  |  |  |  |  |
| 4 | Show clinical skill competence |  |  |  |  |  |
| 5 | Able to relate theory to practice |  |  |  |  |  |
| 6 | Able to communicate knowledge and skills to students for safe practice |  |  |  |  |  |
| 7 | Assist in new experiences without taking over the task from the student |  |  |  |  |  |
| 8 | Available to work with students in clinical setting |  |  |  |  |  |
| 9 | Demonstrate engaging style of bedside teaching |  |  |  |  |  |
| 10 | Demonstrate skills, attitudes & values that are developed by students in clinical area (Role modeling) |  |  |  |  |  |
| 11 | Facilitate critical thinking in clinical practice |  |  |  |  |  |
| 12 | Identifies each individual attribute of the learner |  |  |  |  |  |
| 13 | Evaluate students objectively and fairly |  |  |  |  |  |
| 14 | Provide individualized timely feedback |  |  |  |  |  |
| 15 | Provide constructive feedback on student progress |  |  |  |  |  |
| II | Relationship with students |  |  |  |  |  |
| 1 | Respect student as an individual |  |  |  |  |  |
| 2 | Be realistic in expectations of students’ performance |  |  |  |  |  |
| 3 | Be honest and direct with students |  |  |  |  |  |
| 4 | Encourage students to feel free to ask questions or ask for help |  |  |  |  |  |
| 5 | Allow freedom for discussion |  |  |  |  |  |
| 6 | Allow expression of feeling |  |  |  |  |  |
| 7 | Be supportive & helpful |  |  |  |  |  |
| 8 | Be approachable |  |  |  |  |  |
| III | Personal Attributes |  |  |  |  |  |
| 1 | Demonstrates good communication skills |  |  |  |  |  |
| 2 | Able to collaborate with other disciplines |  |  |  |  |  |
| 3 | Demonstrate self-control & patience |  |  |  |  |  |
| 4 | Demonstrates enthusiasm for teaching |  |  |  |  |  |
| 5 | Demonstrates flexibility in clinical settings |  |  |  |  |  |
| 6 | Exhibit sense of humor |  |  |  |  |  |
| 7 | Admits limitations |  |  |  |  |  |
| 8 | Be organized and well prepared |  |  |  |  |  |
| 9 | Responds promptly |  |  |  |  |  |
| 10 | Responds confidently |  |  |  |  |  |
| 11 | Exhibits responsibility |  |  |  |  |  |
| 12 | Exhibits autonomy |  |  |  |  |  |

Appendix B: The most important effective clinical teaching behavioral characteristics categorized by the administrator position.

Appendix B-1. Most Effective Clinical Teaching Characteristics Ranked by Respiratory Therapy Department Directors

| Item No. | Behavior Description | Category | Mean | Std. Deviation |
| --- | --- | --- | --- | --- |
| PC2 | Shows genuine interest in patients and their care | Professional competence | 4.85 | 0.37 |
| PA3 | Demonstrates self-control & patience | Personal Attributes | 4.71 | 0.48 |
| PC13 | Evaluates students objectively and fairly | Professional competence | 4.71 | 0.48 |
| PC10 | (Role modeling) | Professional competence | 4.71 | 0.48 |
| PA11 | Exhibits responsibility | Personal Attributes | 4.57 | 0.53 |

Appendix B-2. Most Effective Clinical Teaching Characteristics Ranked by Respiratory Therapy Department Managers

| Item No. | Behavior Description | Category | Mean | Std. Deviation |
| --- | --- | --- | --- | --- |
| PA10 | Responds confidently | Personal Attributes | 5.0 | 0.00 |
| PA1 | Demonstrates good communication skills | Personal Attributes | 5.0 | 0.00 |
| PC11 | Facilitates critical thinking in clinical practice | Professional competence | 5.0 | 0.00 |
| PA11 | Exhibits responsibility | Personal Attributes | 4.88 | 0.33 |
| PA9 | Responds promptly | Personal Attributes | 4.88 | 0.33 |

Appendix B-3. Most Effective Clinical Teaching Characteristics Ranked by Respiratory Therapy Department Supervisors

| Item No. | Behavior Description | Category | Mean | Std. Deviation |
| --- | --- | --- | --- | --- |
| RS8 | Be approachable | Relationship with students | 5.0 | 0.00 |
| RS7 | Be supportive & helpful | Relationship with students | 5.0 | 0.00 |
| PC11 | Facilitates critical thinking in clinical practice | Professional competence | 5.0 | 0.00 |
| PC4 | Shows clinical skill competence | Professional competence | 5.0 | 0.00 |
| PA11 | Exhibits responsibility | Personal Attributes | 4.83 | 0.40 |

Appendix B-4. Most Effective Clinical Teaching Characteristics Ranked by Respiratory Therapy Department Educational Coordinators

| Item No. | Behavior Description | Category | Mean | Std. Deviation |
| --- | --- | --- | --- | --- |
| PC10 | (Role modeling) | Professional competence | 4.83 | 0.40 |
| PC4 | Shows clinical skill competence | Professional competence | 4.83 | 0.40 |
| PC2 | Shows genuine interest in patients and their care | Professional competence | 4.83 | 0.40 |
| RS4 | Encourages students to feel free to ask questions or ask for help | Relationship with students | 4.66 | 0.51 |
| PA11 | Exhibits responsibility | Personal Attributes | 4.50 | 0.54 |

Appendix B-5. Most Effective Clinical Teaching Characteristics Ranked by Respiratory Therapy Department Assistant Managers

| Item No. | Behavior Description | Category | Mean | Std. Deviation |
| --- | --- | --- | --- | --- |
| PC10 | (Role modeling) | Professional competence | 5.0 | 0.00 |
| PC6 | Able to communicate knowledge and skills to students for safe practice | Professional competence | 5.0 | 0.00 |
| PC1 | Facilitates student’s awareness of their professional responsibility | Professional competence | 5.0 | 0.00 |
| PA4 | Demonstrates enthusiasm for teaching | Personal Attributes | 4.83 | 0.40 |
| PA2 | Able to collaborate with other disciplines | Personal Attributes | 4.83 | 0.40 |

Appendix B-6. Most Effective Clinical Teaching Characteristics Ranked by Other Respiratory Therapy Department Administrators

| Item No. | Behavior Description | Category | Mean | Std. Deviation |
| --- | --- | --- | --- | --- |
| PA11 | Exhibits responsibility | Personal Attributes | 5.0 | 0.00 |
| PA10 | Responds confidently | Personal Attributes | 5.0 | 0.00 |
| PA3 | Demonstrates self-control & patience | Personal Attributes | 5.0 | 0.00 |
| PA1 | Demonstrates good communication skills | Personal Attributes | 5.0 | 0.00 |
| RS5 | Allows freedom for discussion | Personal Attributes | 5.0 | 0.00 |
